# Supplementary material for: Entangled metal–organic frameworks modulated by N-donor ligands of different conformations
Source: Royal Society of Chemistry journal article supplement (doi:10.1039/b905190m), 2009-01-01
Supplement: b905190m.pdf [file b905190m.pdf]

Electronic Supplementary Material for CrystEngComm  
This journal is (c) The Royal Society of Chemistry 2009

[Supporting information]

## **Entangled Metal-Organic Frameworks Modulated by N-Donor Ligands of Different Conformations**

**Hua-Dong Guo, Dong-Fang Qiu, Xian-Min Guo, Guo-Li Zheng, Xiao Wang, Song Dang  
and Hong-Jie Zhang\***

*State Key Laboratory of Application of Rare Earth Resources utilization, Changchun Institute of Applied Chemistry, Chinese Academy of Sciences, Changchun 130022, China. E-mail: [hongjie@ciac.jl.cn](mailto:hongjie@ciac.jl.cn); Fax: +86-431-85698041; Tel: +86-431-85262127*

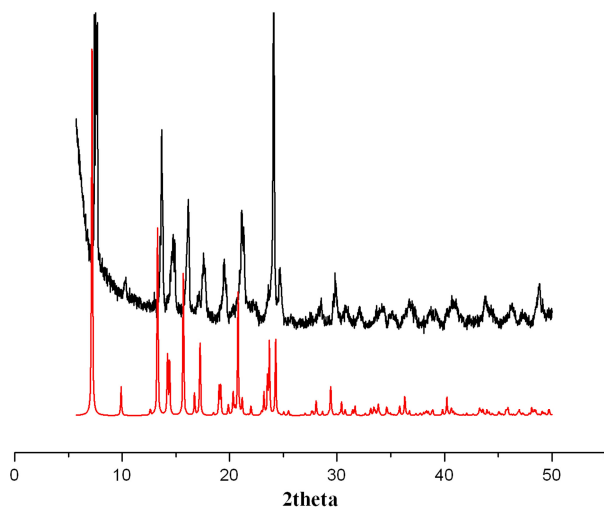

**Figure S1.** The simulated (red) and experimental (black) XRPD patterns for **1**.

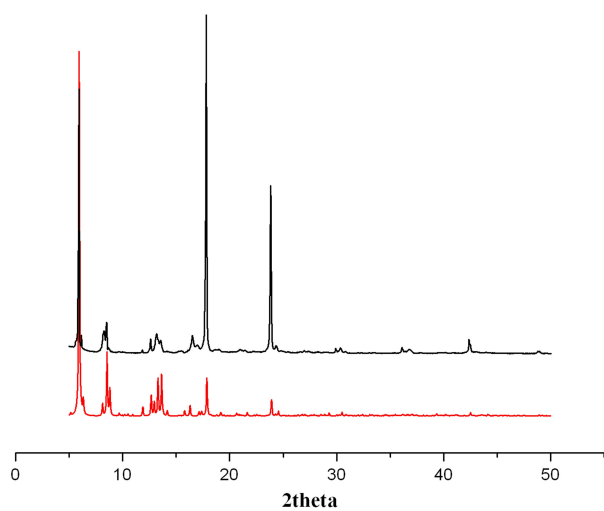

**Figure S2.** The simulated (red) and experimental (black) XRPD patterns for **2**.

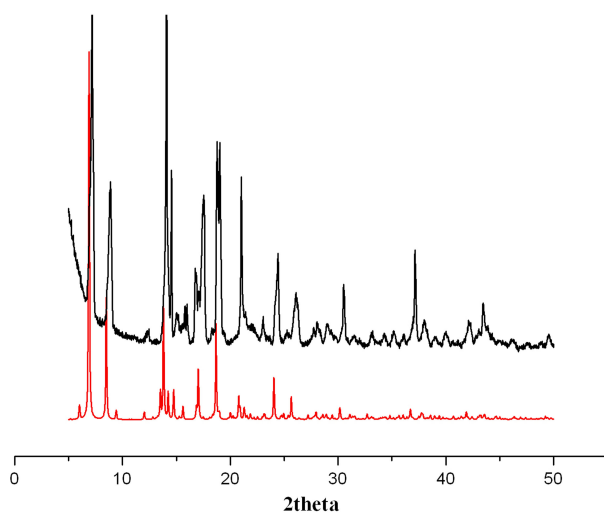

**Figure S3.** The simulated (red) and experimental (black) XRPD patterns for **3**.

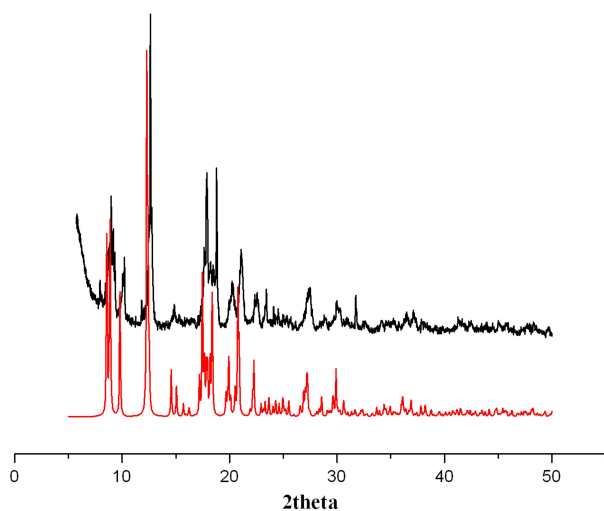

**Figure S4.** The simulated (red) and experimental (black) XRPD patterns for **4**.

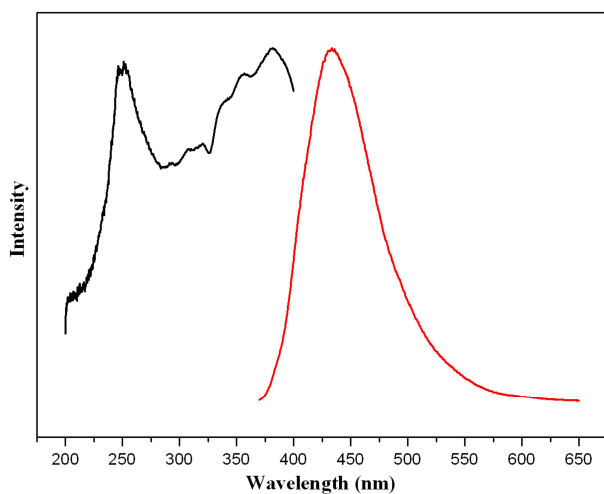

**Figure S5.** Excitation (black) and emission (red) spectra of **1**.

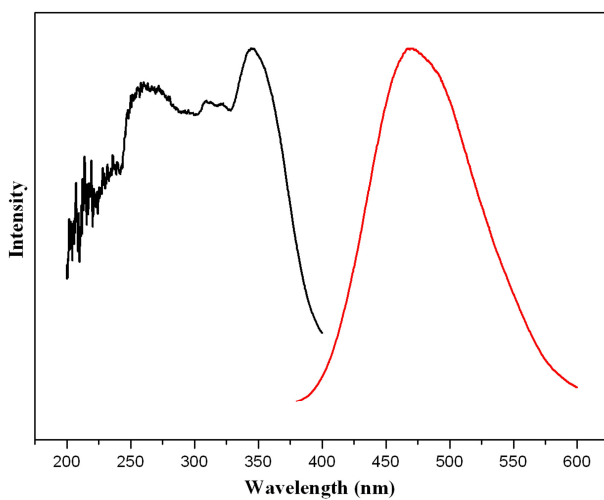

**Figure S6.** Excitation (black) and emission (red) spectra of **2**.

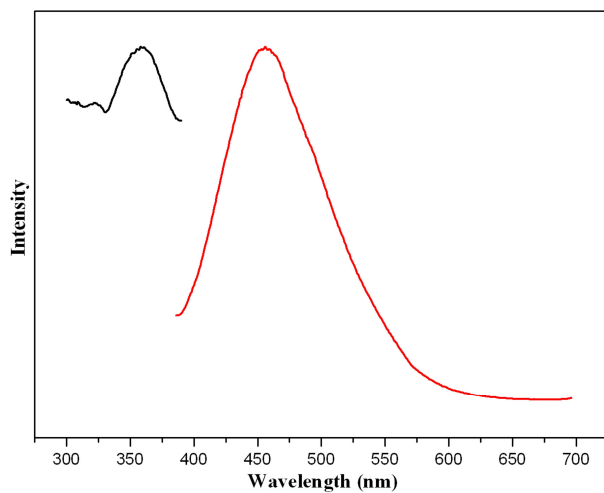

**Figure S7.** Excitation (black) and emission (red) spectra of **3**.

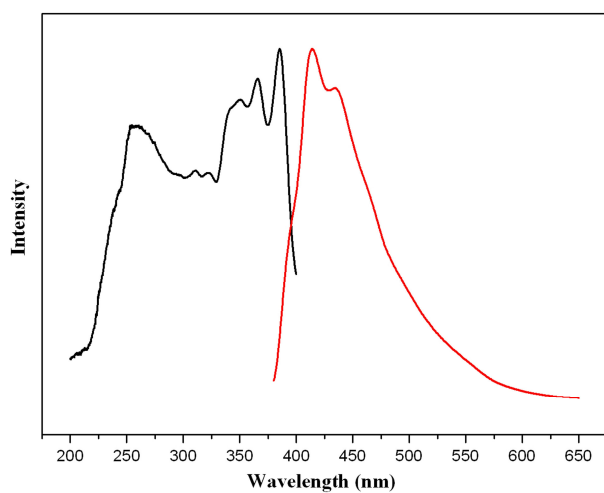

**Figure S8.** Excitation (black) and emission (red) spectra of **4**.

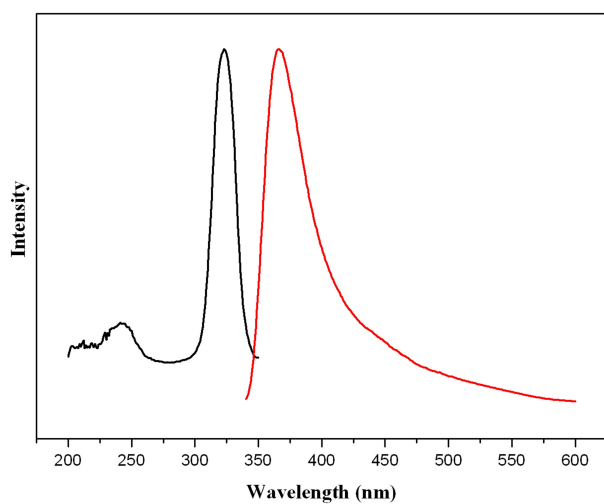

**Figure S9.** Excitation (black) and emission (red) spectra of **L<sup>2</sup>**.

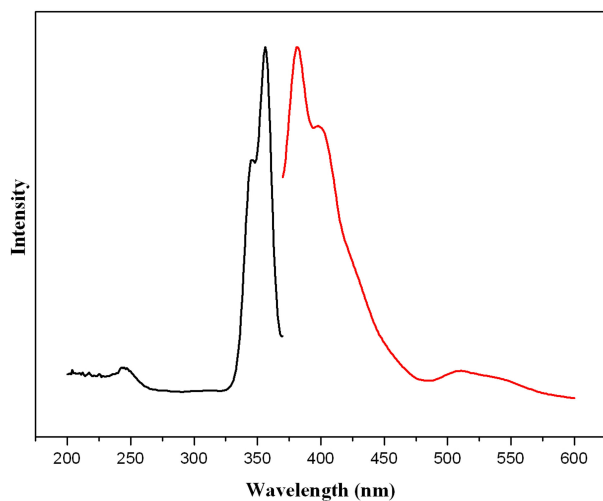

**Figure S10.** Excitation (black) and emission (red) spectra of **L<sup>3</sup>**.

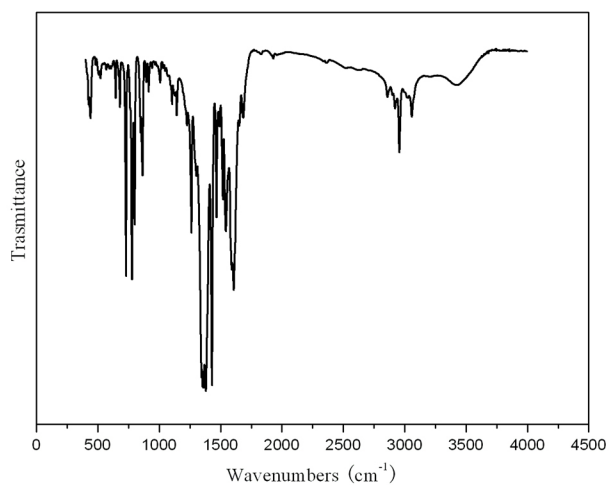

**Figure S11.** IR (4000-400  $\text{cm}^{-1}$ ) spectrum of the compound **1**.

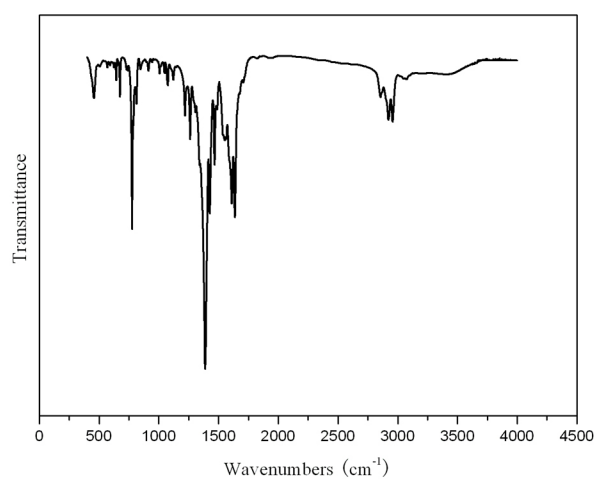

**Figure S12.** IR (4000-400  $\text{cm}^{-1}$ ) spectrum of the compound **2**.

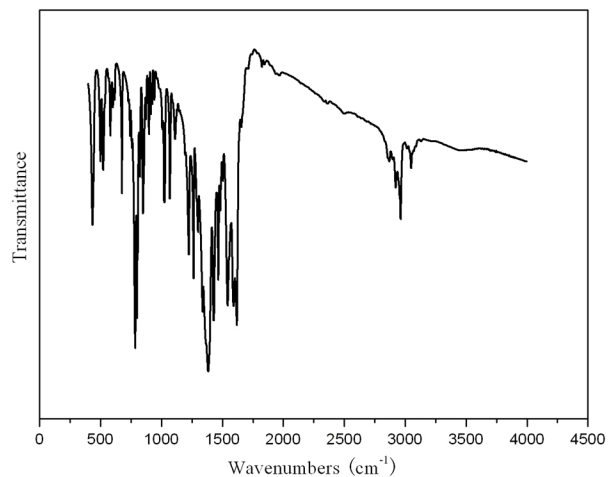

**Figure S13.** IR (4000-400  $\text{cm}^{-1}$ ) spectrum of the compound **3**.

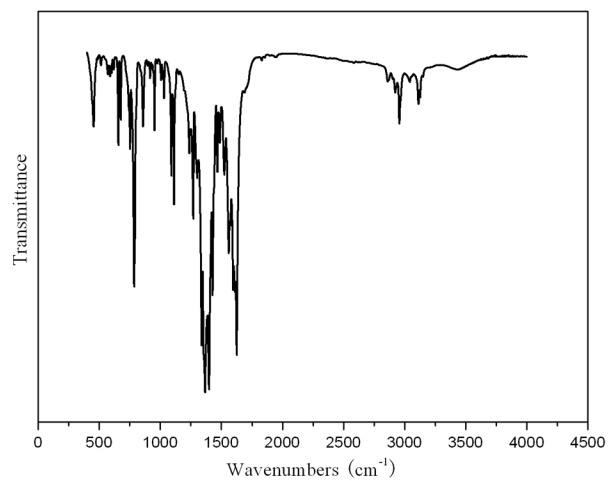

**Figure S14.** IR (4000-400  $\text{cm}^{-1}$ ) spectrum of the compound **4**.

**Table S1.** Selected bond distances (Å) and angles (°) for **1**.

---

|                     |            |
|---------------------|------------|
| Zn(1)-O(2)          | 1.930(3)   |
| Zn(1)-O(3)#1        | 2.073(3)   |
| Zn(1)-N(1)          | 2.074(4)   |
| Zn(1)-N(2)          | 2.107(5)   |
| Zn(1)-O(4)#1        | 2.232(3)   |
| O(3)-Zn(1)#2        | 2.073(3)   |
| O(4)-Zn(1)#2        | 2.232(3)   |
| <br>                |            |
| O(2)-Zn(1)-O(3)#1   | 114.91(16) |
| O(2)-Zn(1)-N(1)     | 141.86(18) |
| O(3)#1-Zn(1)-N(1)   | 102.86(17) |
| O(2)-Zn(1)-N(2)     | 99.12(17)  |
| O(3)#1-Zn(1)-N(2)   | 98.48(16)  |
| N(1)-Zn(1)-N(2)     | 79.62(11)  |
| O(2)-Zn(1)-O(4)#1   | 99.49(11)  |
| O(3)#1-Zn(1)-O(4)#1 | 59.96(13)  |
| N(1)-Zn(1)-O(4)#1   | 94.63(15)  |
| N(2)-Zn(1)-O(4)#1   | 156.16(15) |

---

Symmetry transformations used to generate equivalent atoms:

#1  $x+1/2, -y-1/2, z+1/2$       #2  $x-1/2, -y-1/2, z-1/2$

**Table S2.** Selected bond distances (Å) and angles (°) for **2**.

---

|                     |            |
|---------------------|------------|
| N(1)-Zn(2)          | 2.035(5)   |
| N(2)-Zn(1)          | 2.038(5)   |
| O(1)-Zn(1)          | 2.019(4)   |
| O(2)-Zn(2)          | 2.037(4)   |
| O(3)-Zn(2)#3        | 2.032(4)   |
| O(4)-Zn(1)#3        | 2.037(4)   |
| O(5)-Zn(2)          | 2.023(4)   |
| O(6)-Zn(1)          | 2.026(4)   |
| O(7)-Zn(2)#4        | 2.027(4)   |
| O(8)-Zn(1)#4        | 2.052(4)   |
| Zn(1)-O(4)#5        | 2.037(4)   |
| Zn(1)-O(8)#6        | 2.052(4)   |
| Zn(1)-Zn(2)         | 2.9349(9)  |
| Zn(2)-O(7)#6        | 2.027(4)   |
| Zn(2)-O(3)#5        | 2.032(4)   |
|                     |            |
| O(1)-Zn(1)-O(6)     | 88.7(2)    |
| O(1)-Zn(1)-O(4)#5   | 90.7(2)    |
| O(6)-Zn(1)-O(4)#5   | 156.52(18) |
| O(1)-Zn(1)-N(2)     | 100.13(19) |
| O(6)-Zn(1)-N(2)     | 101.49(19) |
| O(4)#5-Zn(1)-N(2)   | 101.72(19) |
| O(1)-Zn(1)-O(8)#6   | 164.32(18) |
| O(6)-Zn(1)-O(8)#6   | 87.6(2)    |
| O(4)#5-Zn(1)-O(8)#6 | 86.7(2)    |
| N(2)-Zn(1)-O(8)#6   | 95.54(18)  |
| O(1)-Zn(1)-Zn(2)    | 87.20(14)  |
| O(6)-Zn(1)-Zn(2)    | 74.73(13)  |
| O(4)#5-Zn(1)-Zn(2)  | 81.79(12)  |
| N(2)-Zn(1)-Zn(2)    | 171.77(14) |
| O(8)#6-Zn(1)-Zn(2)  | 77.13(12)  |
| O(5)-Zn(2)-O(7)#6   | 88.89(19)  |
| O(5)-Zn(2)-O(3)#5   | 162.72(17) |
| O(7)#6-Zn(2)-O(3)#5 | 88.01(19)  |
| O(5)-Zn(2)-N(1)     | 99.53(18)  |
| O(7)#6-Zn(2)-N(1)   | 106.19(18) |
| O(3)#5-Zn(2)-N(1)   | 97.65(18)  |
| O(5)-Zn(2)-O(2)     | 88.3(2)    |
| O(7)#6-Zn(2)-O(2)   | 155.09(18) |
| O(3)#5-Zn(2)-O(2)   | 87.4(2)    |
| N(1)-Zn(2)-O(2)     | 98.69(19)  |
| O(5)-Zn(2)-Zn(1)    | 84.71(13)  |



Electronic Supplementary Material for CrystEngComm  
This journal is (c) The Royal Society of Chemistry 2009

|                    |            |
|--------------------|------------|
| O(7)#6-Zn(2)-Zn(1) | 82.71(12)  |
| O(3)#5-Zn(2)-Zn(1) | 78.04(12)  |
| N(1)-Zn(2)-Zn(1)   | 170.11(14) |
| O(2)-Zn(2)-Zn(1)   | 72.39(13)  |

---

Symmetry transformations used to generate equivalent atoms:

#1  $x-1/2, -y+1/2, z-1/2$     #2  $x+1/2, -y+1/2, z+1/2$   
#3  $x, -y, z-1/2$     #4  $x, -y+1, z-1/2$     #5  $x, -y, z+1/2$   
#6  $x, -y+1, z+1/2$

**Table S3.** Selected bond distances (Å) and angles (°) for **3**.

---

|                      |            |
|----------------------|------------|
| Zn(1)-O(10)          | 1.979(3)   |
| Zn(1)-O(1)           | 2.008(3)   |
| Zn(1)-O(2)#1         | 2.026(3)   |
| Zn(1)-O(5)           | 2.034(3)   |
| Zn(1)-O(6)#1         | 2.034(3)   |
| Zn(1)-Zn(1)#1        | 2.9499(10) |
| Zn(2)-N(3)           | 2.030(4)   |
| Zn(2)-O(7)#2         | 2.034(3)   |
| Zn(2)-O(8)#3         | 2.038(3)   |
| Zn(2)-O(3)           | 2.047(3)   |
| Zn(2)-O(4)#4         | 2.063(3)   |
| O(2)-Zn(1)#1         | 2.026(3)   |
| O(6)-Zn(1)#1         | 2.034(3)   |
| O(7)-Zn(2)#5         | 2.034(3)   |
| O(8)-Zn(2)#6         | 2.038(3)   |
|                      |            |
| O(10)-Zn(1)-O(1)     | 100.06(14) |
| O(10)-Zn(1)-O(2)#1   | 100.44(14) |
| O(1)-Zn(1)-O(2)#1    | 159.42(15) |
| O(10)-Zn(1)-O(5)     | 102.39(14) |
| O(1)-Zn(1)-O(5)      | 86.74(17)  |
| O(2)#1-Zn(1)-O(5)    | 90.56(16)  |
| O(10)-Zn(1)-O(6)#1   | 98.12(14)  |
| O(1)-Zn(1)-O(6)#1    | 87.92(16)  |
| O(2)#1-Zn(1)-O(6)#1  | 87.49(17)  |
| O(5)-Zn(1)-O(6)#1    | 159.40(15) |
| O(10)-Zn(1)-Zn(1)#1  | 173.48(10) |
| O(1)-Zn(1)-Zn(1)#1   | 81.05(11)  |
| O(2)#1-Zn(1)-Zn(1)#1 | 78.38(10)  |
| O(5)-Zn(1)-Zn(1)#1   | 84.06(11)  |
| O(6)#1-Zn(1)-Zn(1)#1 | 75.46(11)  |
| N(3)-Zn(2)-O(7)#2    | 98.18(14)  |
| N(3)-Zn(2)-O(8)#3    | 100.39(14) |
| O(7)#2-Zn(2)-O(8)#3  | 88.66(13)  |
| N(3)-Zn(2)-O(3)      | 103.66(14) |
| O(7)#2-Zn(2)-O(3)    | 90.63(13)  |
| O(8)#3-Zn(2)-O(3)    | 155.79(14) |
| N(3)-Zn(2)-O(4)#4    | 101.41(14) |
| O(7)#2-Zn(2)-O(4)#4  | 160.28(14) |
| O(8)#3-Zn(2)-O(4)#4  | 85.62(12)  |
| O(3)-Zn(2)-O(4)#4    | 86.97(12)  |
| N(3)-Zn(2)-Zn(2)#4   | 176.63(11) |

Electronic Supplementary Material for CrystEngComm  
This journal is (c) The Royal Society of Chemistry 2009

|                      |           |
|----------------------|-----------|
| O(7)#2-Zn(2)-Zn(2)#4 | 82.33(9)  |
| O(8)#3-Zn(2)-Zn(2)#4 | 76.28(9)  |
| O(3)-Zn(2)-Zn(2)#4   | 79.65(10) |
| O(4)#4-Zn(2)-Zn(2)#4 | 77.98(10) |

---

Symmetry transformations used to generate equivalent atoms:

#1  $-x+1/2, -y+1/2, -z+1$     #2  $x, y+1, z$   
#3  $-x+1, y+1, -z+1/2$     #4  $-x+1, y, -z+1/2$   
#5  $x, y-1, z$     #6  $-x+1, y-1, -z+1/2$     #7  $x, -y, z+1/2$   
#8  $-x+1, y, -z+3/2$     #9  $x, -y, z-1/2$

**Table S4.** Selected bond distances (Å) and angles (°) for **4**.

---

|                     |            |
|---------------------|------------|
| N(1)-Zn(1)          | 1.981(6)   |
| O(1)-Zn(1)#2        | 1.938(4)   |
| O(2)-Zn(1)          | 1.948(4)   |
| O(3)-Zn(1)#3        | 1.910(4)   |
| Zn(1)-O(3)#4        | 1.910(4)   |
| Zn(1)-O(1)#2        | 1.938(4)   |
| <hr/>               |            |
| O(3)#4-Zn(1)-O(1)#2 | 108.16(19) |
| O(3)#4-Zn(1)-O(2)   | 95.98(19)  |
| O(1)#2-Zn(1)-O(2)   | 114.2(2)   |
| O(3)#4-Zn(1)-N(1)   | 121.2(2)   |
| O(1)#2-Zn(1)-N(1)   | 110.9(2)   |
| O(2)-Zn(1)-N(1)     | 105.8(2)   |

---

Symmetry transformations used to generate equivalent atoms:

#1  $-x+1, y, -z-1/2$     #2  $-x+1, -y, -z$     #3  $x+1/2, y-1/2, -z+1/2$

#4  $x-1/2, y+1/2, -z+1/2$
